# Supplementary material for: Efficient targeted mutagenesis of rice and tobacco genomes using Cpf1 from Francisella novicida
Source: Springer Nature journal article supplement (doi:10.1038/srep38169), 2016-12-01

## Supplemental information

### **Efficient targeted mutagenesis of rice and tobacco genomes using Cpf1 from *Francisella novicida***

Akira Endo<sup>1,+</sup>, Mikami Masahumi<sup>1,2,+</sup>, Hidetaka Kaya<sup>1</sup> and Seiichi Toki<sup>1,2,3,\*</sup>

<sup>1</sup>Plant Genome Engineering Research Unit, Institute of Agrobiological Sciences, National Agriculture and Food Research Organization, 2-1-2 Kannondai, Tsukuba, Ibaraki 305-8602, Japan.

<sup>2</sup>Graduate School of Nanobioscience, Yokohama City University, 22-2 Seto, Yokohama, Kanagawa 236-0027, Japan.

<sup>3</sup>Kihara Institute for Biological Research, Yokohama City University, 641-12 Maioka-cho, Yokohama, Kanagawa 244-0813, Japan.

<sup>+</sup>These authors contributed equally to this work.

\*Corresponding author: Seiichi Toki

Phone number: +81-29-838-8450

Email address: stoki@affrc.go.jp

## Supplemental Figure Legends

### Figure S1. Heteroduplex mobility assay of *crNtSTF1*-1~3 loci.

PCR products were amplified from *crNtSTF1*-1 (top two panels), *crNtSTF1*-2 (middle two panels) and *crNtSTF1*-3 (bottom two panels) loci. Those products were subjected to heteroduplex mobility assay using MultiNA. (S) and (T) indicate PCR products amplified from the loci including each target sequence on *N. sylvestris* and *N. tomentosiformis* genomes, respectively.

### Figure S2. *dl* mutant phenotype at T0 generation.

Both plant were transgenic rice possessing *FnCpf1(Os)* with *crOsDL-2*. *dl/dl* indicates plant having biallelic mutation on *crOsDL-2* locus (Left side). *DL/DL* indicates plant without mutation on *crOsDL-2* locus (Right side).

### Figure S3. CAPS analysis of *crOsDL-1* locus in T1 generation of line #18.

-: Non-digested PCR products, +: *Pst* I-digested PCR products. Arrow head indicated the position of undigested PCR products. An undigested band indicates mutation in the target locus.

### Figure S4. CAPS analysis of *OsNCED* or *OsAO* gene families to survey off-target mutation.

CAPS analysis of *crOsNCED1-1* and *crOsAO1-1* loci. -: Non-digested PCR products, + : *Sac* I or *Nde* I-digested PCR products. Arrow head indicated the position of undigested PCR products. An undigested band indicates mutation in the target loci.

**Table S1. List of primers used in this study**

| Plant species            | Primer                  | Sequence                            | Application                             |                                         |
|--------------------------|-------------------------|-------------------------------------|-----------------------------------------|-----------------------------------------|
| <i>Nicotiana tabacum</i> | NIPDS-1(S) F            | ATAGCTGCTGCTGAGATTTGTAAAG           | crNIPDS-1 HMA                           |                                         |
|                          | NIPDS-1(S) R            | GCCATACTAAAGAACAACGAAATGCTTACG      | crNIPDS-1 HMA                           |                                         |
|                          | NIPDS-1(T) F            | AAATAGCTGCTGATGAGTTTTGCAAG          | crNIPDS-1 HMA                           |                                         |
|                          | NIPDS-1(T) R            | GGCCATACTAAAGAACAATGAAATGCTTACA     | crNIPDS-1 HMA                           |                                         |
|                          | NIPDS-2(S&T) F          | GGATTCTAACCTGAAGAAATCTGTTCAAAGC     | crNIPDS-2 HMA                           |                                         |
|                          | NIPDS-2(S&T) R          | TGGATGAGAAAGCAAGTGCCTG              | crNIPDS-2 HMA                           |                                         |
|                          | NISTF-1(S) F            | AGCAGGAGGAGTGGCAGAAT                | crNISTF-1(S) HMA                        |                                         |
|                          | NISTF-1(S) R            | CTACTGCATATTATTGGAGAAGTAGTTCAGAT    | crNISTF-1(S) HMA                        |                                         |
|                          | NISTF-1(T) F            | GCAGCAGGAGTGGCAGAATG                | crNISTF-1(T) HMA                        |                                         |
|                          | NISTF-1(T) R            | GACTACTACTGCAAAATATTGGAGTAGTAATAG   | crNISTF-1(T) HMA                        |                                         |
|                          | NISTF-2(S) F            | CTACTGCAGCAATAGTAATACTATATCTGGA     | crNISTF-2(S) HMA                        |                                         |
|                          | NISTF-2(S) R            | AACAATGTTTTCCATATTTTCGTGTTTACG      | crNISTF-2(S) HMA                        |                                         |
|                          | NISTF-2(T) F            | TCATCTACTGCATCAATCAGTAATACTATTACTAC | crNISTF-2(T) HMA                        |                                         |
|                          | NISTF-2(T) R            | AAGATTGTTTTCGATATTTTCGTGTTTGT       | crNISTF-2(T) HMA                        |                                         |
|                          | NISTF-3(S) F            | GCAGCAGCAATGATAACAACGACGATA         | crNISTF-3(S) HMA                        |                                         |
|                          | NISTF-3(S) R            | CATACACATGATCAAAATGCATTTACG         | crNISTF-3(S) HMA                        |                                         |
|                          | NISTF-3(T) F            | GCAGCAGCAACGACGATAATAATC            | crNISTF-3(T) HMA                        |                                         |
|                          | NISTF-3(T) R            | CATAGACATGGTCCAAATGCATTTTAAAG       | crNISTF-3(T) HMA                        |                                         |
|                          | NISTF-4(S) F            | GGCACCATGATCCATCCTATCAA             | crNISTF-4(S) CAPS                       |                                         |
|                          | NISTF-4(S) R            | CATACACATGATCAAAATGCATTTACG         | crNISTF-4(S) CAPS                       |                                         |
|                          | NISTF-4(T) F            | GGCACCATGATCCATCCTATCAC             | crNISTF-4(T) CAPS                       |                                         |
|                          | NISTF-4(T) R            | CATAGACATGGTCCAAATGCATTTTAAAG       | crNISTF-4(T) CAPS                       |                                         |
|                          |                         | Tar-Cpf1-crRNA_NIPDS-1F             | agatTCATCCAGTCTTAACACTTAAAC             | cloning of crRNA into <i>Bbs</i> I site |
|                          |                         | Tar-Cpf1-crRNA_NIPDS-1R             | aaaaGTTTAAAGTGTAAAGGACTGGATGA           | cloning of crRNA into <i>Bbs</i> I site |
|                          |                         | Tar-Cpf1-crRNA_NIPDS-2F             | agatACATGGCAATGAACACCTCATCTG            | cloning of crRNA into <i>Bbs</i> I site |
|                          |                         | Tar-Cpf1-crRNA_NIPDS-2R             | aaaaCAGATGAGGTTCATTGCCATGT              | cloning of crRNA into <i>Bbs</i> I site |
|                          | Tar-Cpf1-crRNA_NISTF-1F | agatCTAGCTGATCAAAGGAATGCCACG        | cloning of crRNA into <i>Bbs</i> I site |                                         |
|                          | Tar-Cpf1-crRNA_NISTF-1R | aaaaCGTGGCATTCTTTGATCAGCTAG         | cloning of crRNA into <i>Bbs</i> I site |                                         |
|                          | Tar-Cpf1-crRNA_NISTF-2F | agatGCTCCATTGTCGTCTTGGTGTG          | cloning of crRNA into <i>Bbs</i> I site |                                         |
|                          | Tar-Cpf1-crRNA_NISTF-2R | aaaaCAACACCAAGAACGACAATGGAGC        | cloning of crRNA into <i>Bbs</i> I site |                                         |
|                          | Tar-Cpf1-crRNA_NISTF-3F | agatTAAGTGGAAAGAACTCAAAAAACT        | cloning of crRNA into <i>Bbs</i> I site |                                         |
|                          | Tar-Cpf1-crRNA_NISTF-3R | aaaaAGTTTTTTGAGTTCTTCCACTTA         | cloning of crRNA into <i>Bbs</i> I site |                                         |
|                          | Tar-Cpf1-crRNA_NISTF-4F | agatAGAGAAGGATGAAGTAGAGATATC        | cloning of crRNA into <i>Bbs</i> I site |                                         |
|                          | Tar-Cpf1-crRNA_NISTF-4R | aaaaGATATCTCTACTTCATCCTTCTCT        | cloning of crRNA into <i>Bbs</i> I site |                                         |
|                          | AtU6-26 F               | ATCTGTTCATAGTTTGTCCAGG              | crRNA sequence check                    |                                         |
| <i>Oryza sativa</i>      | OsDL-1F                 | cagtgatcatgtccatctttcgcttccatt      | crOsDL-1 CAPS                           |                                         |
|                          | OsDL-1R                 | atgggcaagagagaaatcttttgcattcca      | crOsDL-1 CAPS                           |                                         |
|                          | OsDL-2F                 | tgcaaaagatttctctcttggccatctgtg      | crOsDL-2 CAPS                           |                                         |
|                          | OsDL-2R                 | ttctctcaCTCATGAAGCGGTGTGAAGCAG      | crOsDL-2 CAPS                           |                                         |
|                          | OsALS-1F                | AATTATGCCGTGGATAAGGCTGACCTGTTG      | crOsALS-1,2 CAPS                        |                                         |
|                          | OsALS-1R                | acccaataagatcgaccgagagaggggaaa      | crOsALS-1,2 CAPS                        |                                         |
|                          | OsNCED1-1F              | GTCGGGAAGAGTGCATTTGGCTCCCGAA        | crOsNCED1-1 CAPS                        |                                         |
|                          | OsNCED1-1R              | CTTCTTGATCACGCTAGCTGAGCGCGTG        | crOsNCED1-1 CAPS                        |                                         |
|                          | OsNCED2-1F              | CGCGGAGGAGGTGGCAAGAAGAGGATG         | crOsNCED1-1 CAPS off-target             |                                         |
|                          | OsNCED2-1R              | GGCTGCTCAAGCTCGATCTCGACGTCGGGT      | crOsNCED1-1 CAPS off-target             |                                         |
|                          | OsNCED3-1F              | GCAACCGTCCCAACCAATGGCAAGTCAAG       | crOsNCED1-1 CAPS off-target             |                                         |
|                          | OsNCED3-1R              | CCGTGGCGGTGAAGTAGAAGTACTTGAGG       | crOsNCED1-1 CAPS off-target             |                                         |
|                          | OsAAO1-1F               | ACATCATCATGGCCAGAGGTTGTCTTCT        | crOsAAO1-1 CAPS                         |                                         |
|                          | OsAAO1-1R               | AGAGAATATGTACCAGAAGCTTGGAGCTCA      | crOsAAO1-1 CAPS                         |                                         |
|                          | OsAAO2-1F               | ACATCATCATGGCCAGAGGCTGTCTTCC        | crOsAAO1-1 CAPS                         |                                         |
|                          | OsAAO2-1R               | TCTAAGATGCTCTAACATGGGTAGCACGAA      | crOsAAO1-1 CAPS                         |                                         |
|                          | OsAAO3+4-1F             | GGCACACAATACCCTTTTCGCTCAGACAT       | crOsAAO1-1 CAPS off-target              |                                         |
|                          | OsAAO3-1R               | TATCCTTGCCAGAAACAAGTGAAGGATCTTCTTT  | crOsAAO1-1 CAPS off-target              |                                         |
|                          | OsAAO4-1R               | ACCACAACCCGAGAAGTGTCCAGCAAAC        | crOsAAO1-1 CAPS off-target              |                                         |
|                          | OsAAO5-1F               | CAAAGCCATCGAGATACTACGGTCAGATGG      | crOsAAO1-1 CAPS off-target              |                                         |
|                          | OsAAO5-1R               | CGACTTTCTTGATTGGTTTCCGACTGGTT       | crOsAAO1-1 CAPS off-target              |                                         |
|                          |                         | Tar-Cpf1-crRNA_DL-1F                | AGATgtcttttgggtagCTGCAGGTGG             | cloning of crRNA into <i>Bbs</i> I site |
|                          |                         | Tar-Cpf1-crRNA_DL-1R                | AAAACCAACCTGCAGctaccocaaagac            | cloning of crRNA into <i>Bbs</i> I site |
|                          |                         | Tar-Cpf1-crRNA_DL-2F                | AGATgGACCTTGCACTGACTGCAGGAG             | cloning of crRNA into <i>Bbs</i> I site |
|                          |                         | Tar-Cpf1-crRNA_DL-2R                | AAAACCTCTGCAGTCAAGTCAAGTCCc             | cloning of crRNA into <i>Bbs</i> I site |
|                          |                         | Tar-Cpf1-crRNA_ALS-2F               | AGATccaacatacagattatagaTTAAT            | cloning of crRNA into <i>Bbs</i> I site |
|                          | Tar-Cpf1-crRNA_ALS-2R   | AAAAATTAAtctataatctgtatgttgg        | cloning of crRNA into <i>Bbs</i> I site |                                         |
|                          | Tar-Cpf1-crRNA_ALS-1F   | AGATACTCTTCTTTGTTACACGGACTG         | cloning of crRNA into <i>Bbs</i> I site |                                         |
|                          | Tar-Cpf1-crRNA_ALS-1R   | AAAACAGTCCGTGTAACAAGAAGAGT          | cloning of crRNA into <i>Bbs</i> I site |                                         |
|                          | Tar-Cpf1-crRNA_NCED1-1F | AGATCCCAAGGCCATTGGGGAGCTCCAT        | cloning of crRNA into <i>Bbs</i> I site |                                         |
|                          | Tar-Cpf1-crRNA_NCED1-1R | AAAAATGGAGCTCCCAATGGCCTTGGG         | cloning of crRNA into <i>Bbs</i> I site |                                         |
|                          | Tar-Cpf1-crRNA_AAO-1F   | AGATGCAATGCTGTGCATATGTTAAT          | cloning of crRNA into <i>Bbs</i> I site |                                         |
|                          | Tar-Cpf1-crRNA_AAO-1R   | AAAAATTAACATATGACACAGCATTCG         | cloning of crRNA into <i>Bbs</i> I site |                                         |
|                          | OsU6-2F                 | TGCTGGAATTGCCCTTGGATCATGAACCAA      | crRNA sequence check                    |                                         |

Figure S1.

crNtSTF-1

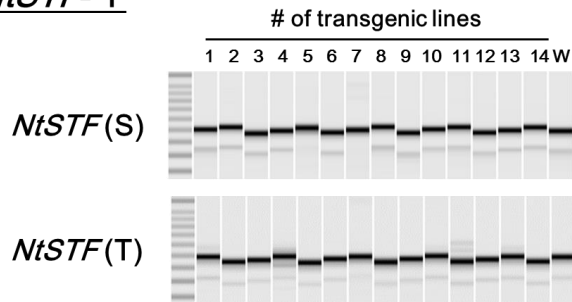

crNtSTF-2

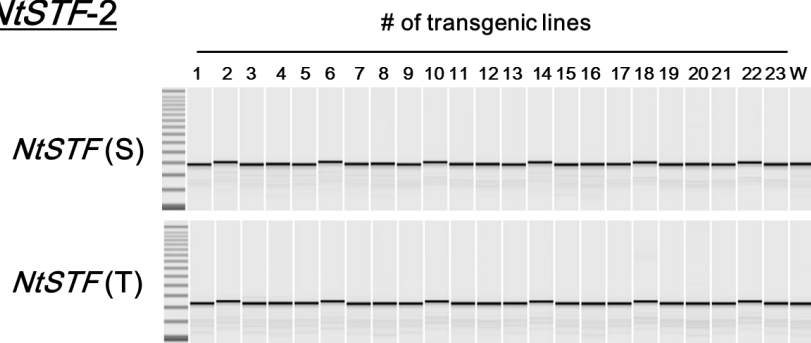

crNtSTF-3

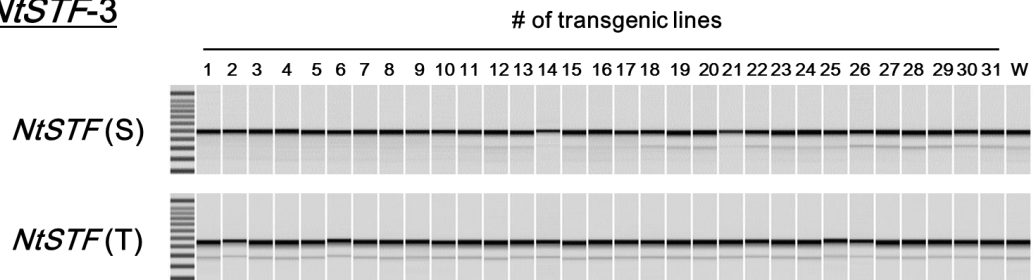

Figure S2.

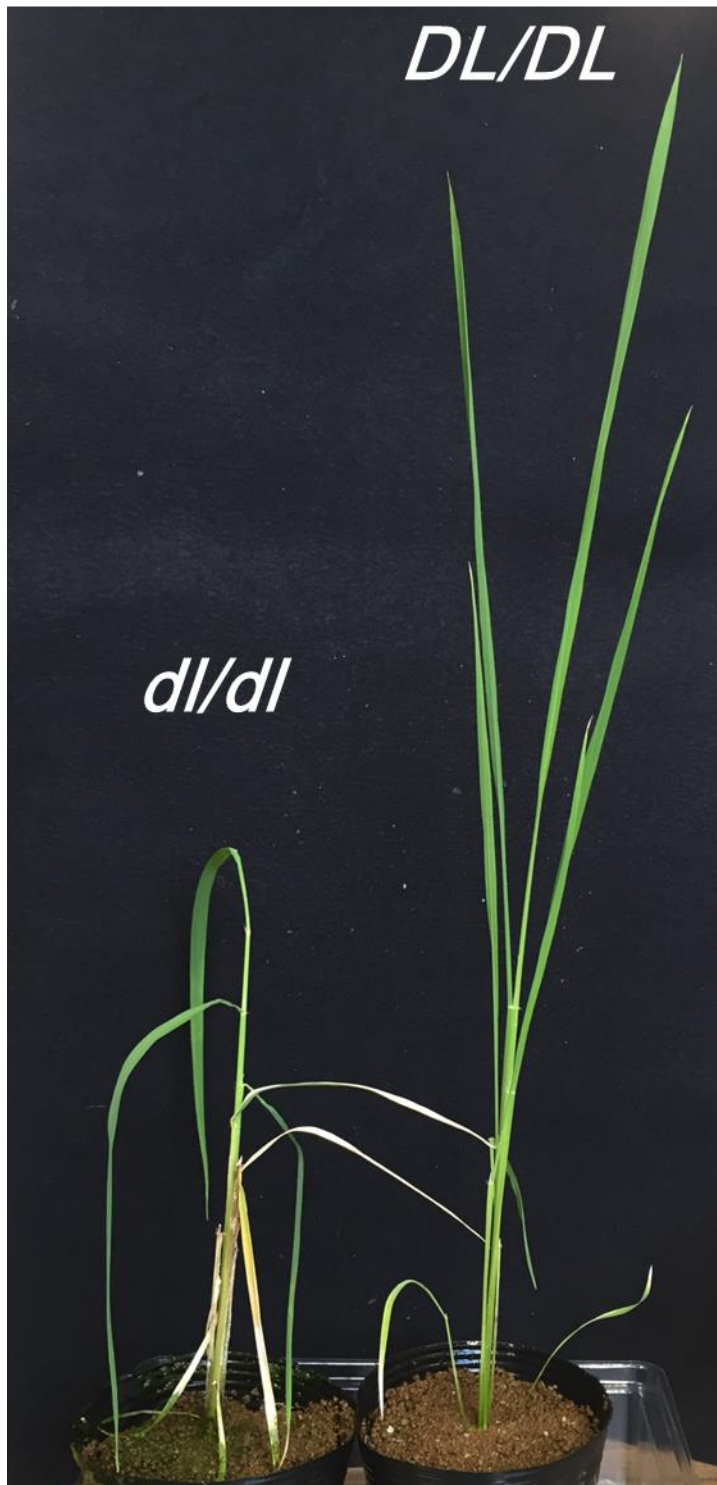

Figure S3.

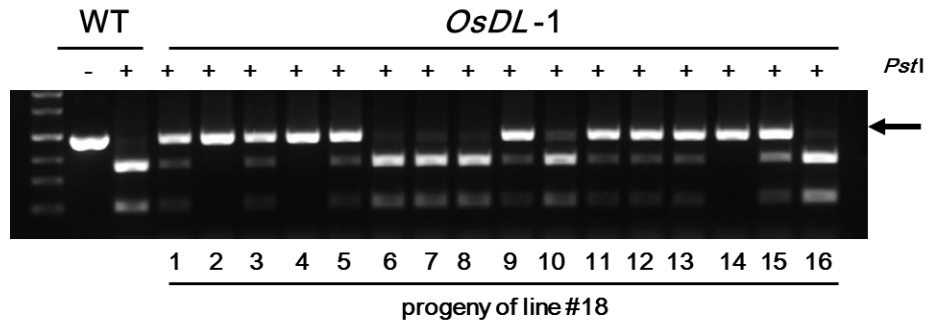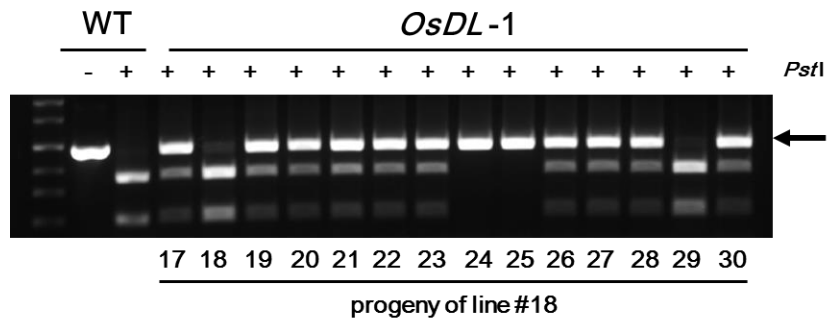

Figure.S4

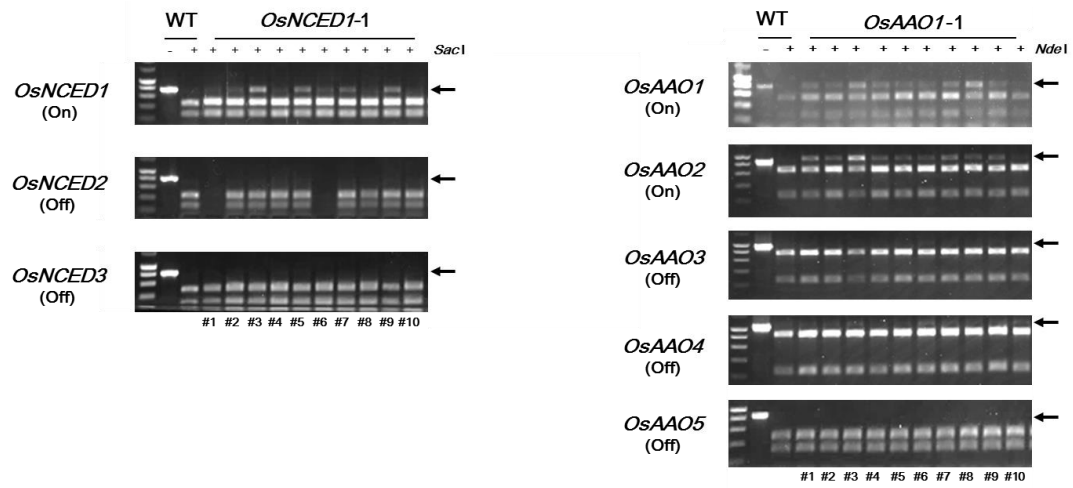

Supplement: 41598_2016_BFsrep38169_MOESM1_ESM.pdf [file 41598_2016_BFsrep38169_MOESM1_ESM.pdf]
